# Supplementary material
Source: PubMed Central journal article supplement (PMC2174167)
Supplement: mbc_E07-09-0961_1.pdf [file mbc_E07-09-0961_1.pdf]

**Table S1.** Strains used in this study.

| Strain  | Genotype                                                                                                                    | Source                           |
|---------|-----------------------------------------------------------------------------------------------------------------------------|----------------------------------|
| BY4741  | <i>MATa leu2Δ0 his3Δ1 ura3Δ0 met15Δ0</i>                                                                                    | (Brachmann <i>et al.</i> , 1998) |
| BY4742  | <i>MATα leu2Δ0 his3Δ1 ura3Δ0 lys2Δ0</i>                                                                                     | (Brachmann <i>et al.</i> , 1998) |
| JOY121  | <i>MATα RTT101-V5-VSV::KANMX6 leu2Δ0 his3Δ1 ura3Δ met15Δ0</i>                                                               | I. Stagljär                      |
| JOY124  | <i>MATα RTT101-V5-VSV::KANMX6 rtt107Δ::NATMX6 leu2Δ0 his3Δ1 ura3Δ0</i>                                                      | This study                       |
| TRY100  | <i>MATa RTT107-V5-VSV::KANMX6 mms22Δ::NATMX6 leu2Δ0 his3Δ1 ura3Δ0</i>                                                       | This study                       |
| TRY102  | <i>MATa RTT107-V5-VSV::KANMX6 rtt101Δ::NATMX6 leu2Δ0 his3Δ1 ura3Δ0</i>                                                      | This study                       |
| TRY104  | <i>MATa RTT107-V5-VSV::KANMX6 mms1Δ::NATMX6 leu2Δ0 his3Δ1 ura3Δ0</i>                                                        | This study                       |
| TRY106  | <i>MATa RTT107-V5-VSV::KANMX6 rtt109Δ::NATMX6 leu2Δ0 his3Δ1 ura3Δ0</i>                                                      | This study                       |
| TRY148  | <i>MATα RTT101-V5-VSV::KANMX6 rtt109Δ::NATMX6 leu2Δ0 his3Δ1 ura3Δ0</i>                                                      | This study                       |
| TRY30   | <i>MATα RTT07-V5-VSV::KANMX6 leu2Δ0 his3Δ1 ura3Δ lys2Δ0</i>                                                                 | (Roberts <i>et al.</i> , 2006)   |
| TRY49   | <i>MATa RTT107-V5-VSV::KANMX6 slx4Δ::KANMX6 leu2Δ0 his3Δ1 ura3Δ lys2Δ0</i>                                                  | (Roberts <i>et al.</i> , 2006)   |
| TRY52   | <i>MATa RTT107-V5-VSV::KANMX6 rad53-11::URA3 leu2Δ0 his3Δ1 ura3Δ</i>                                                        | (Roberts <i>et al.</i> , 2006)   |
| TRY76   | <i>MATa RTT07-V5-VSV::KANMX6 mec1Δ::LEU2 sml1Δ::NATMX6 leu2Δ0 his3Δ1 ura3Δ</i>                                              | (Roberts <i>et al.</i> , 2006)   |
| TRY96   | <i>MATa RTT107-V5-VSV::KANMX6 asf1Δ::NATMX6 leu2Δ0 his3Δ1 ura3Δ0</i>                                                        | This study                       |
| JOY129  | <i>MATa RTT107-6HIS-10FLAG::KANMX6 leu2Δ0 his3Δ1 ura3Δ0 met15Δ0</i>                                                         | This study                       |
| TRY179  | <i>MATa RTT107-6HIS-10FLAG::KANMX6 rtt109Δ::NATMX6 leu2Δ0 his3Δ1 ura3Δ0 met15Δ0</i>                                         | This study                       |
| W3031A  | <i>MATa ade2-1 ura3-1 his3-11,15 leu2-3,112 trp1-1 can1-100</i>                                                             | (Thomas and Rothstein, 1989)     |
| GBY668  | <i>MATa RTT107-V5-VSV::KANMX6 ade2-1 ura3-1 his3-11,15 leu2-3,112 trp1-1 can1-10</i>                                        | This Study                       |
| GBY670  | <i>MATa RTT107-V5-VSV::KANMX6 hht2-hhf2ΔKANMX6 hht1::hht1-K56R::TRP1 ade2-1 ura3-1 his3-11,15 leu2-3,112 trp1-1 can1-10</i> | This Study                       |
| GBY671  | <i>MATa RTT107-V5-VSV::KANMX6 hht2-hhf2ΔKANMX6 ade2-1 ura3-1 his3-11,15 leu2-3,112 trp1-1 can1-10</i>                       | This Study                       |
| ICY1497 | <i>MATa hst3Δ::his5+ hst4Δ::NATMX6 ade2-1 ura3-1 his3-11,15 leu2-3,112 trp1-1 can1-10</i>                                   | (Celic <i>et al.</i> , 2006)     |
| JOY122  | <i>MATa rtt107Δ::KANMX6 ade2-1 ura3-1 his3-11,15 leu2-3,112 trp1-1 can1-10</i>                                              | This Study                       |
| JOY126  | <i>MATa hst3Δ::his5+ hst4Δ::NATMX6 rtt107Δ::KANMX6 ade2-1 ura3-1 his3-11,15 leu2-3,112 trp1-1 can1-10</i>                   | This Study                       |
| TRY139  | <i>MATa hst3Δ::his5+ hst4Δ::NATMX6 ade2-1 ura3-1 his3-11,15 leu2-3,112 trp1-1 can1-10 pRS315</i>                            | This Study                       |
| TRY140  | <i>MATa hst3Δ::his5+ hst4Δ::NATMX6 ade2-1 ura3-1 his3-11,15 leu2-3,112 trp1-1 can1-10 pRS315-RTT107</i>                     | This Study                       |
| TRY141  | <i>MATa hst3Δ::his5+ hst4Δ::NATMX6 rtt107Δ::KANMX6 ade2-1 ura3-1 his3-11,15 leu2-3,112 trp1-1 can1-10 pRS315</i>            | This Study                       |
| TRY142  | <i>MATa hst3Δ::his5+ hst4Δ::NATMX6 rtt107Δ::KANMX6 ade2-1 ura3-1 his3-11,15 leu2-3,112 trp1-1 can1-10 pRS315-RTT107</i>     | This Study                       |
| yIZ99   | <i>MATa RTT107-13myc::HIS5MX leu2Δ0 his3Δ1 ura3Δ0 met15Δ0</i>                                                               | This Study                       |
| yIZ110  | <i>MATa RTT107-13myc::HIS5MX GAL-3HA-RTT101::KANMX leu2Δ0 his3Δ1 ura3Δ0 met15Δ0</i>                                         | This Study                       |
| TRY88   | <i>MATα DDC2::YFP[natMX] can1Δ::MFA1pr-HIS3 mfalpα1Δ::MF1pr-LEU2 lyp1Δ leu2Δ0 his3Δ1 ura3Δ0 met15Δ0 LYS2+</i>               | This Study                       |
| JVY9    | <i>MATa mms1Δ[kanMX] DDC2::YFP[natMX] can1Δ::MFA1pr-HIS3 leu2Δ0 his3Δ1 ura3Δ0 met15Δ0</i>                                   | This Study                       |
| JVY12-1 | <i>MATa mms22Δ[kanMX] DDC2::YFP[natMX] can1Δ::MFA1pr-HIS3 leu2Δ0 his3Δ1 ura3Δ0 met15Δ0</i>                                  | This Study                       |

References:

Brachmann, C.B., Davies, A., Cost, G.J., Caputo, E., Li, J., Hieter, P., and Boeke, J.D. (1998). Designer deletion strains derived from *Saccharomyces cerevisiae* S288C: a useful set of strains and plasmids for PCR-mediated gene disruption and other applications. *Yeast* *14*, 115-132.

Celic, I., Masumoto, H., Griffith, W.P., Meluh, P., Cotter, R.J., Boeke, J.D., and Verreault, A. (2006). The sirtuins hst3 and Hst4p preserve genome integrity by controlling histone h3 lysine 56 deacetylation. *Curr Biol* *16*, 1280-1289.

Roberts, T.M., Kobor, M.S., Bastin-Shanower, S.A., Ii, M., Horte, S.A., Gin, J.W., Emili, A., Rine, J., Brill, S.J., and Brown, G.W. (2006). Slx4 regulates DNA damage checkpoint-dependent phosphorylation of the BRCT domain protein Rtt107/Esc4. *Mol Biol Cell* *17*, 539-548.

Thomas, B.J., and Rothstein, R. (1989). Elevated recombination rates in transcriptionally active DNA. *Cell* *56*, 619-630.
